# Supplementary material
Source: publisher site journal article supplement (https://www.dovepress.com/article/487530)
Supplement: Supplementary file 1 [file get_supplementary_file.php]

**Case Scenarios for Simulated Client Study and Data Collecting tools**

**Section A: Instruction to the data collector**

1. *Approach the pharmacy workers in a humble and nice manner*
2. *Kindly greet the receptionist, and ask if you would talk to a pharmacist or any other person responsible if you could talk to them about your symptoms*
3. *Kindly explain the reason for your pharmacy visit (tell your scenario)*

General Information (please record)

1. Name of the pharmacy
2. Location
3. Sex of the attending personnel

***Section B: Case Scenario’s***

Case Scenarios

The Sore Throat Scenario. I have a 24-year-old male relative experiencing pain in throat with difficulty of swallowing and slight fever for the last 24 hours. I would like you to recommend some drug for me?

The Acute Diarrhea Scenario. I have a 23-year-old male relative experiencing a loose bowel motion accompanied by 4-5 episodes of diarrhea and slight weakness with slight fever for one-day duration. I would like you to recommend some drugs for me

The UTI Scenario. I have a 24-year-old female relative experiencing a burning sensation upon urination for 3 consecutive days, I would like to buy drugs for her?

*Upper respiratory Tract Scenario*. I have a 3-year-old child experiencing runny nose, mild fever and little bit of cough. I would like to buy some drugs for her, please what can I buy?

Section C: Pharmacy Professional Response

1. Agrees to sell antibiotics
2. Refuses to sell antibiotics

If the Pharmacy profession agrees to sell the antibiotic, at what level did they allow? (Tick the appropriate response)

1. Antibiotic recommended on first time of explaining the scenario (level 1)
2. If the pharmacy profession doesn’t recommend antibiotics on first demand, please go on and say; This medication is not very strong, can’t you give me something stronger?” (Level 2)
3. If the pharmacy profession doesn’t still provide antibiotics, please say “I would like an antibiotic,” (Level 3).

**Section D: A record of the dialogue between the pharmacy profession and the simulated client**

To the Data Collector: Kindly take note if the pharmacy profession does the following

1. Did the pharmacy profession advise on how to take the drug?
2. Ask you about drug allergies?
3. Asked about other symptoms
4. Ask you about use of other drugs
5. Asked you about pregnancy (if female), and recommendation to consult a physician

If the pharmacy assistance refuses to sell you the antibiotics, did they cite any reason why they didn’t allow to sell you (document)
